# Supplementary material for: Investigating the Effects of Diet-Induced Prediabetes on Skeletal Muscle Strength in Male Sprague Dawley Rats
Source: MDPI journal article supplement (doi:10.3390/ijms25074076), 2024-04-06
Supplement: s1 [file s1]

**Table S1:** Composition of the high fats high carbohydrates (HFHC) diet

| <b>Ingredient</b>   | <b>Incl(%)</b> | <b>Mix(kg)</b> |
|---------------------|----------------|----------------|
| Maize               | 38.98          | 390.000        |
| Palm Oil            | 20.99          | 210.000        |
| Soya Full Fat       | 14.99          | 150.000        |
| Wheat Gluten        | 6.50           | 65.000         |
| Flour               | 6.00           | 60.000         |
| Monodex             | 5.00           | 50.000         |
| Sugar - White       | 5.00           | 50.000         |
| Limestone           | 1.00           | 10.000         |
| Dicalcium Phosphate | 0.50           | 5.000          |
| Vitamin Premix      | 0.35           | 3.500          |
| Salt - Fine         | 0.30           | 3.000          |
| Amino Acid - DL     |                |                |
| Methionine          | 0.30           | 3.000          |
| Mineral Premix      | 0.10           | 1.000          |
|                     | <b>100.01</b>  | <b>1000.50</b> |

**Table S2:** Nutritional value of the high fats high carbohydrates (HFHC) diet

| <b>Nutrient</b>      | <b>Units</b> | <b>Actual</b> |
|----------------------|--------------|---------------|
| Dry Matter           | g/kg         | 919.93        |
| Metabolizable Energy | MJ/kg        | 15.86         |
| Crude Protein        | g/kg         | 151.27        |
| AShreonine           | g/kg         | 4.51          |
| ASIsolucine          | g/kg         | 5.24          |
| ASLysine             | g/kg         | 6.54          |
| ASMethionine         | g/kg         | 4.86          |
| ASryptophan          | g/kg         | 1.30          |
| ASstidine            | g/kg         | 3.30          |
| ASTSAA               | g/kg         | 6.79          |
| ASValine             | g/kg         | 5.80          |
| Fat                  | g/kg         | 250.46        |
| Carbohydrate         | g/kg         | 427.29        |
| Fibre                | g/kg         | 22.08         |
| Ash                  | g/kg         | 26.31         |
| Avl Phosphorus       | g/kg         | 1.66          |

|                  |      |      |
|------------------|------|------|
| Calcium          | g/kg | 5.47 |
| Total Phosphorus | g/kg | 3.60 |

**Table S3:** Composition of fats, proteins and carbohydrates of the standard diet.

|                         |      |
|-------------------------|------|
| <b>Fats</b>             | 15 % |
| <b>Proteins</b>         | 30 % |
| <b>Carbohydrates</b>    | 35 % |
| <b>Other components</b> | 20%  |
